# Supplementary material for: Instantaneous Frequency Extraction for Nonstationary Signals via a Squeezing Operator with a Fixed-Point Iteration Method
Source: MDPI journal article supplement (doi:10.3390/rs16081412), 2024-04-16
Supplement: s1 [file s1]

"BECKMAN BAT PULSE"

Richard Baraniuk  
Rice University  
richb@rice.edu

DESCRIPTION:

Digitized echolocation pulse emitted by the Large Brown Bat, *Eptesicus Fuscus*. There are 400 samples; the sampling period was 7 microseconds.

ACKNOWLEDGE AS FOLLOWS:

The author wishes to thank Curtis Condon, Ken White, and Al Feng of the Beckman Center at the University of Illinois for the bat data and for permission to use it in this paper.

0.0029  
0.0024  
0.002  
0.0024  
0.0015  
0.0015  
0.002  
0.002  
0.0005  
0.0015  
0.0005  
0.0015  
0  
-0.0015  
0.001  
0.0015  
-0.0049  
-0.001  
0.0063  
-0.0049  
-0.0083  
0.0127  
0.0068

-0.0259  
0.0059  
0.0386  
-0.0405  
-0.0269  
0.0474  
0.0151  
-0.063  
-0.0093  
0.0659  
-0.0073  
-0.0684  
0  
0.0728  
-0.0146  
-0.0752  
0.0029  
0.0771  
-0.0024  
-0.085  
-0.0063  
0.0698  
0.0264  
-0.0908  
-0.0254  
0.0605  
0.0669  
-0.083  
-0.0542  
0.0347  
0.0845  
-0.0391  
-0.0903  
0.0078  
0.0737  
0.0474  
-0.1108  
-0.0449  
0.0513  
0.0903  
-0.04  
-0.106  
0.0049

0.0684  
0.0776  
-0.0923  
-0.0801  
0.0366  
0.0742  
0.0537  
-0.1113  
-0.0591  
0.0508  
0.0718  
0.0376  
-0.1196  
-0.0503  
0.0527  
0.0679  
0.0449  
-0.1128  
-0.0566  
0.0508  
0.0654  
0.0659  
-0.1084  
-0.0732  
0.043  
0.064  
0.083  
-0.0771  
-0.104  
0.0205  
0.0737  
0.0762  
-0.0068  
-0.1357  
-0.0234  
0.0762  
0.0557  
0.0771  
-0.1216  
-0.0918  
0.0532  
0.0728  
0.0723

-0.0156  
-0.1436  
-0.02  
0.0835  
0.0498  
0.0947  
-0.103  
-0.1279  
0.0405  
0.0908  
0.0415  
0.0732  
-0.145  
-0.0898  
0.0757  
0.0786  
0.0439  
0.0459  
-0.1646  
-0.0591  
0.0903  
0.064  
0.0415  
0.0425  
-0.167  
-0.0522  
0.0869  
0.0581  
0.0322  
0.064  
-0.1626  
-0.0718  
0.0903  
0.0679  
0.0156  
0.0972  
-0.1479  
-0.1138  
0.0786  
0.0884  
0.0088  
0.1069  
-0.0942

-0.1675  
0.0396  
0.1069  
0.021  
0.0464  
0.0327  
-0.2012  
-0.0376  
0.1138  
0.063  
-0.0083  
0.1172  
-0.1265  
-0.1587  
0.0684  
0.1138  
0.0083  
0.0244  
0.0742  
-0.1958  
-0.0674  
0.1152  
0.084  
-0.0205  
0.0547  
0.0088  
-0.2139  
-0.0059  
0.1362  
0.0513  
-0.0327  
0.0747  
-0.0322  
-0.208  
0.0405  
0.145  
0.0278  
-0.0435  
0.0728  
-0.0215  
-0.2021  
0.0444  
0.1426

0.022  
-0.0557  
0.0513  
0.04  
-0.2031  
0.0146  
0.1455  
0.0317  
-0.062  
0.0098  
0.1226  
-0.1719  
-0.0596  
0.1387  
0.0723  
-0.0532  
-0.0342  
0.1206  
-0.0396  
-0.1738  
0.0718  
0.1255  
-0.0137  
-0.0625  
0.02  
0.147  
-0.1489  
-0.084  
0.1284  
0.0742  
-0.0542  
-0.0449  
0.0811  
0.0894  
-0.1924  
-0.0083  
0.1348  
0.0259  
-0.0684  
-0.0215  
0.105  
0.0483  
-0.1895

0.0283  
0.1279  
0.0083  
-0.0693  
-0.0176  
0.1128  
0.0566  
-0.1865  
0.0176  
0.126  
0.0103  
-0.0728  
-0.0132  
0.0918  
0.1035  
-0.166  
-0.0229  
0.1279  
0.0278  
-0.063  
-0.0205  
0.0532  
0.1431  
-0.0923  
-0.1108  
0.106  
0.0684  
-0.0449  
-0.041  
0.0254  
0.1025  
0.0586  
-0.1646  
0.0146  
0.1128  
0.0059  
-0.061  
-0.0073  
0.0454  
0.1138  
-0.0093  
-0.146  
0.0703

0.084  
-0.0239  
-0.0527  
0.0122  
0.0469  
0.0908  
-0.0029  
-0.123  
0.0679  
0.0732  
-0.0293  
-0.0469  
0.0181  
0.0347  
0.0542  
0.062  
-0.1182  
0.0254  
0.0811  
-0.0068  
-0.0444  
0.001  
0.0347  
0.0234  
0.0688  
-0.0088  
-0.0767  
0.0703  
0.0352  
-0.0322  
-0.02  
0.021  
0.0205  
0.0088  
0.063  
0.0186  
-0.0596  
0.0444  
0.0181  
-0.0142  
-0.0103  
0.0083  
0.0137



0.0098  
0.0303  
0.0635  
-0.0312  
-0.0166  
0.0322  
0.0024  
-0.0083  
0  
0.0098  
0.0137  
0.0176  
0.0264  
0.042  
0.0015  
-0.0239  
0.0142  
0.0039  
-0.0039  
0.001  
0.0093  
0.0103  
0.0166  
0.0229  
0.0239  
0.022  
-0.0083  
-0.0151  
0.0039  
0.0059  
0.002  
0.0039  
0.0146  
0.0181  
0.0156  
0.0142  
0.0137  
0.0088  
0.001  
-0.0054  
-0.0005  
0.0029  
0.0083

0.0103  
0.0132  
0.0166  
0.0122  
0.0078  
0.0103  
0.0098  
0.0049  
0.002  
0  
0.0044  
0.0103  
0.0107  
0.0093  
0.0088  
0.0083  
0.0078  
0.0063  
0.0049  
0.0073  
0.002  
0.0034  
0.0068  
0.0073  
0.0093  
0.0083  
0.0083  
0.0073  
0.0078  
0.0063  
0.0054  
0.0029  
0.0024
